# Supplementary material
Source: PubMed Central journal article supplement (PMC8785725)
Supplement: 6900_3_supp_60518_qkb2md.pdf [file 6900_3_supp_60518_qkb2md.pdf]

# Urine Microscopy Lecture Series: Pre-Survey

We know you are incredibly busy, so we made sure that this survey can be completed in under 3 minutes! The results of this survey will help us better understand knowledge of and attitudes towards urine microscopy. Please answer the questions (3 clinical questions) below without any resources. Your responses will be anonymous. Images below used with permission from the Renal Fellow Network.

1. What is your current level of training?

- PGY-1
- PGY-2
- PGY-3
- Other: \_\_\_\_\_

2. Which of the following best describes you?

- Preliminary intern
- Categorical internal medicine intern or resident
- Med-Peds intern or resident
- Other: \_\_\_\_\_

3. Which of the following areas are you currently most interested in?

- Primary Care
- Hospital Medicine
- Nephrology
- Pulmonary & Critical Care
- Hematology & Oncology
- Cardiology
- Gastroenterology
- Infectious Diseases
- Endocrinology
- Rheumatology
- Geriatrics
- Palliative Medicine
- Other: \_\_\_\_\_

4. How interested are you in pursuing nephrology as a career?

- Very interested
- Somewhat interested
- Neutral
- Not very interested
- Not all interested

5. Have you ever performed urine microscopy analysis?

- Yes
- No
- I'm not sure

6. How comfortable do you feel performing and interpreting urine microscopy?

- Very comfortable
- Somewhat comfortable
- Neutral
- Not very comfortable
- Not at all comfortable

7. How helpful do you think urine microscopy is in the evaluation of patients with acute kidney injury?

- Very helpful
- Somewhat helpful
- Neutral
- Not very helpful
- Not at all helpful

8. Please share any comments or thoughts on your experiences with urine microscopy here.

---

---

---

---

---

9. In which of the following pathologies would you expect to see the urine sediment below?

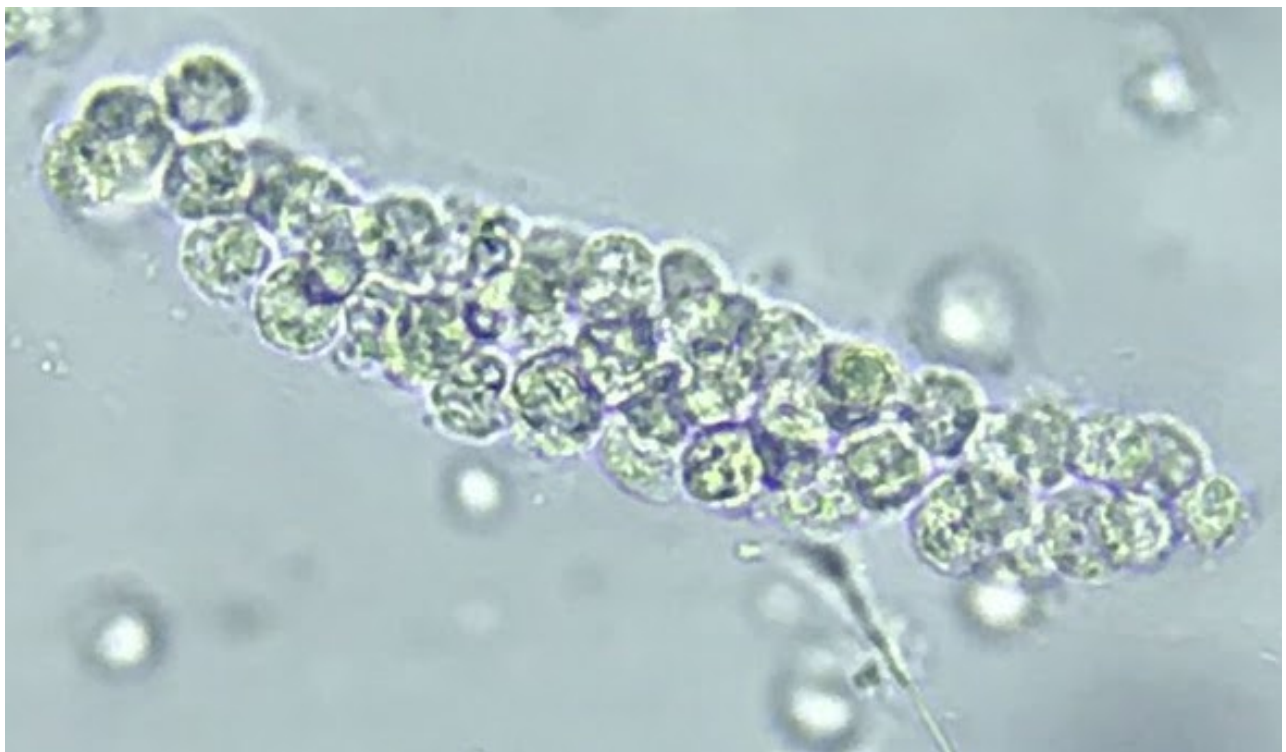

- Nephrotic syndrome
- Acute tubular necrosis
- Acute interstitial nephritis
- Renal vein thrombosis
- Glomerulonephritis

10. In which of the following pathologies would you expect to see the urine sediment below?

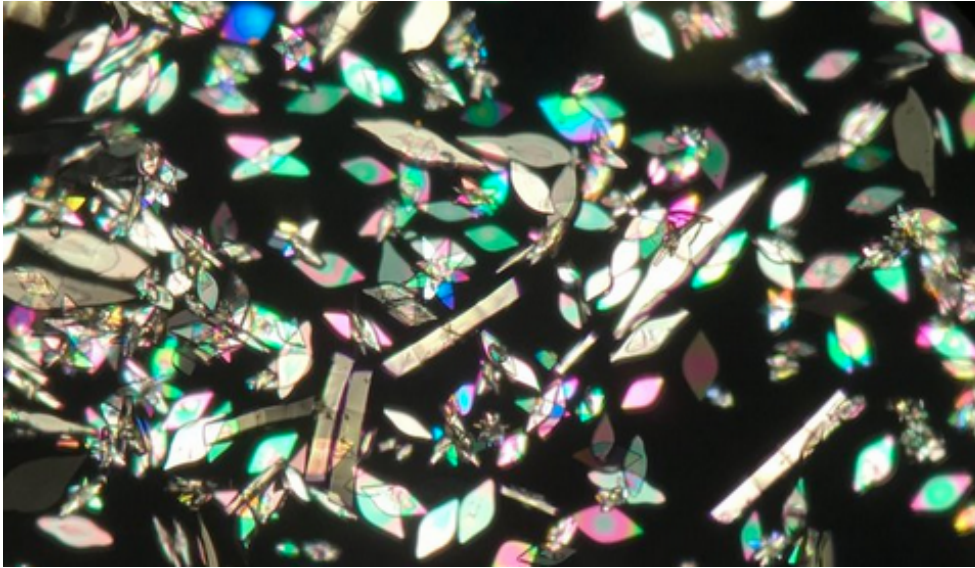

- Acute tubular necrosis
- Tumor lysis syndrome
- Milk-alkali syndrome
- Ethylene glycol toxicity
- Nephrotic syndrome

11. The urine sediment below would most likely be observed in which of the following clinical scenarios?

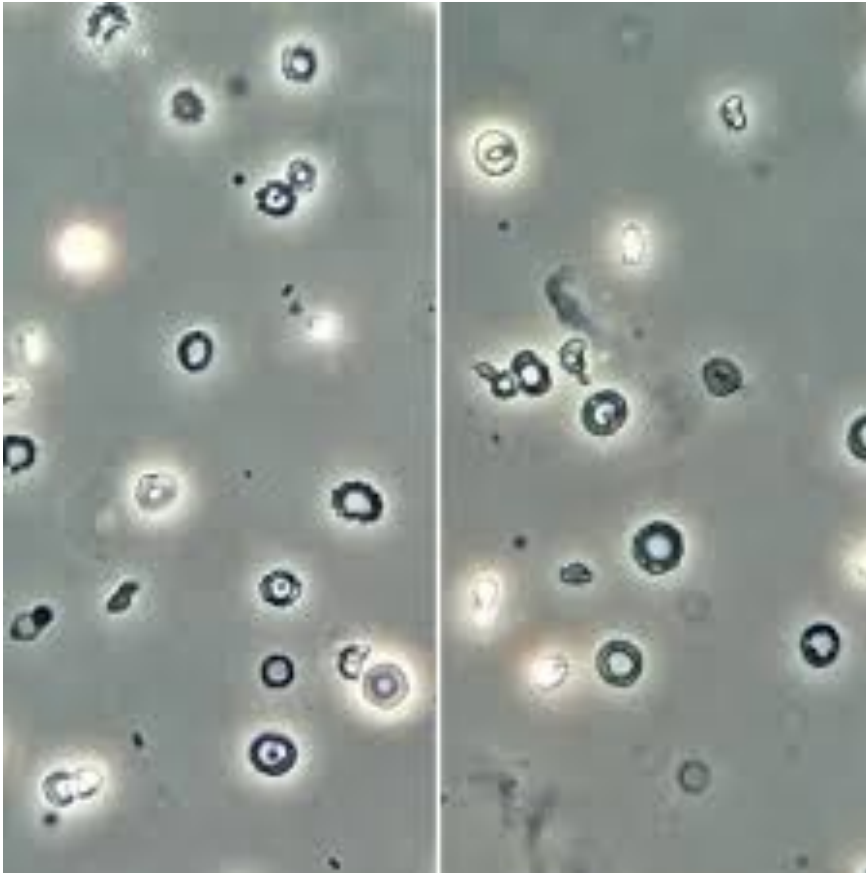

- A 78 y/o with septic shock requiring three vasopressors
- A 30 y/o with an acute kidney injury (AKI), urine protein/creatinine ratio of 8 mg/g, and albumin 1.3 g/dL
- A 45 y/o with an AKI after being treated with piperacillin-tazobactam for several days
- A 25 y/o with an AKI and elevated anti-neutrophil cytoplasmic antibody (ANCA) titers
- A 55 y/o with an AKI, hypercalcemia, and new diagnosis of multiple myeloma.

12. Please list your age to the nearest year.

---

13. What is your gender?

Non-binary

Woman

Man

Prefer not to disclose

Prefer to self-describe (use "other")

Other:  \_\_\_\_\_

---

This content is neither created nor endorsed by Google.

Google Forms
